# Supplementary figures and images for: Both modular and single‐domain Type I polyketide synthases are expressed in the brevetoxin‐producing dinoflagellate, Karenia brevis (Dinophyceae)
Source: PubMed Central journal article supplement — J Phycol. 2017 Nov 3;53(6):1325–39. doi: 10.1111/jpy.12586 (PMC5725682; doi:10.1111/jpy.12586), 2017-11-03

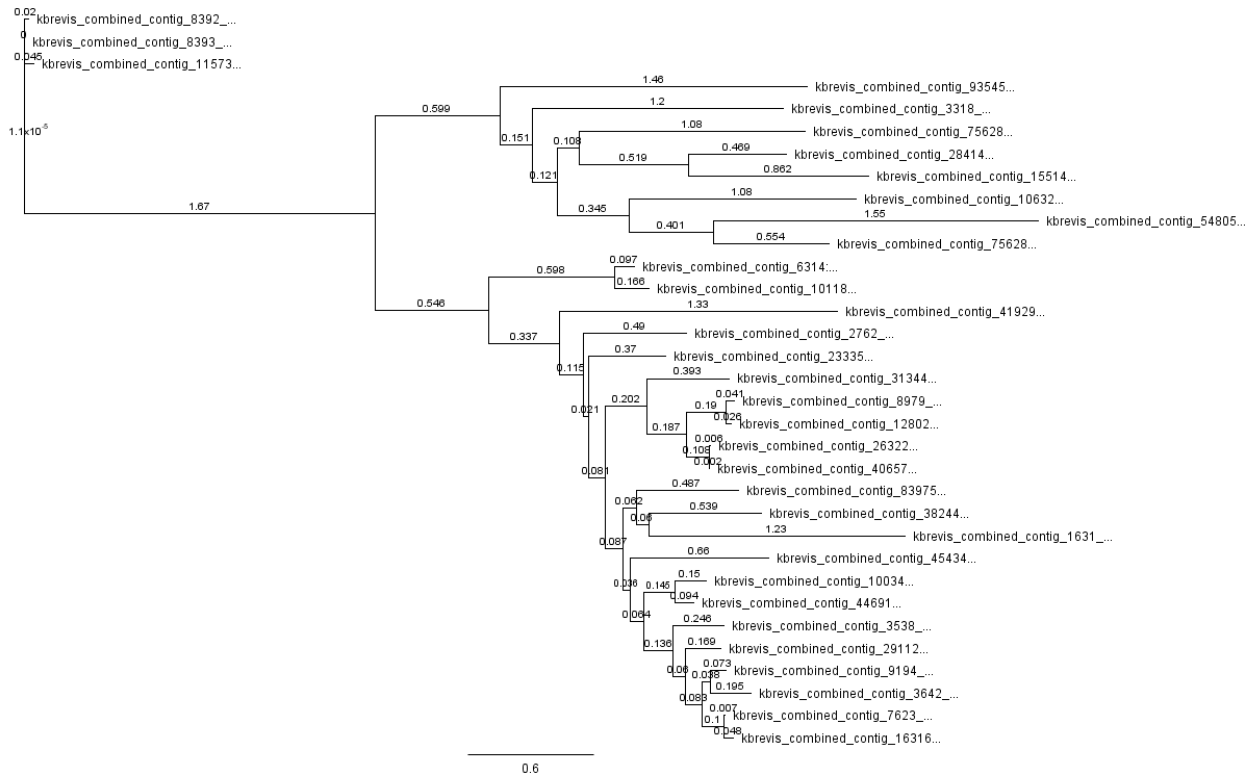

Figure S1.

Supplement: JPY-53-1325-s001.pdf [file JPY-53-1325-s001.pdf]
